# Supplementary material
Source: MDPI journal article supplement (https://www.mdpi.com/2075-4698/7/4/32)
Supplement: s1 [file s1]

**Table 1: Support for Trump's Campaign by Length of Time as Vegan**

|               |                  |       | How Long Have You Been Vegan? |           |          |        |
|---------------|------------------|-------|-------------------------------|-----------|----------|--------|
|               |                  |       | > 5 Years                     | 1-5 Years | < 1 Year | Total  |
| America First | Agree or neutral | Count | 16                            | 17        | 7        | 40     |
|               |                  | %     | 11.3%                         | 14.4%     | 31.8%    | 14.2%  |
|               | Disagree         | Count | 125                           | 101       | 15       | 241    |
|               |                  | %     | 88.7%                         | 85.6%     | 68.2%    | 85.8%  |
|               | Total            | Count | 141                           | 118       | 22       | 281    |
|               |                  | %     | 100.0%                        | 100.0%    | 100.0%   | 100.0% |

|                              | Value              | df | Asymp. Sig. (2-sided) |
|------------------------------|--------------------|----|-----------------------|
| Pearson Chi-Square           | 6.537 <sup>a</sup> | 2  | .038                  |
| Likelihood Ratio             | 5.404              | 2  | .067                  |
| Linear-by-Linear Association | 4.569              | 1  | .033                  |
| N of Valid Cases             | 281                |    |                       |

a. 1 cells (16.7%) have expected count less than 5. The minimum expected count is 3.12.

**Table 2: Feelings about Trump's Election by Motivation for Veganism**

|                         |                                 |       | What is Your Primary Motivation for Being a Vegan? |           |             |        |
|-------------------------|---------------------------------|-------|----------------------------------------------------|-----------|-------------|--------|
|                         |                                 |       | Animal Ethics                                      | My Health | Environment | Total  |
| Feelings about Election | Worried                         | Count | 211                                                | 16        | 29          | 256    |
|                         |                                 | %     | 91.3%                                              | 84.2%     | 93.5%       | 91.1%  |
|                         | Not Worried, Neutral, or Unsure | Count | 20                                                 | 3         | 2           | 25     |
|                         |                                 | %     | 8.7%                                               | 15.8%     | 6.5%        | 8.9%   |
|                         | Total                           | Count | 231                                                | 19        | 31          | 281    |
|                         |                                 | %     | 100.0%                                             | 100.0%    | 100.0%      | 100.0% |

|                              | Value              | df | Asymp. Sig. (2-sided) |
|------------------------------|--------------------|----|-----------------------|
| Pearson Chi-Square           | 1.359 <sup>a</sup> | 2  | .507                  |
| Likelihood Ratio             | 1.191              | 2  | .551                  |
| Linear-by-Linear Association | .004               | 1  | .947                  |
| N of Valid Cases             | 281                |    |                       |

a. 2 cells (33.3%) have expected count less than 5. The minimum expected count is 1.69.

**Table 3: Support for Trump's Campaign by Motivation for Veganism**

|               |                  |       | What is Your Primary Motivation for Being a Vegan? |           |             |        |
|---------------|------------------|-------|----------------------------------------------------|-----------|-------------|--------|
|               |                  |       | Animal Ethics                                      | My Health | Environment | Total  |
| America First | Agree or neutral | Count | 34                                                 | 4         | 2           | 40     |
|               |                  | %     | 14.7%                                              | 21.1%     | 6.5%        | 14.2%  |
|               | Disagree         | Count | 197                                                | 15        | 29          | 241    |
|               |                  | %     | 85.3%                                              | 78.9%     | 93.5%       | 85.8%  |
|               | Total            | Count | 231                                                | 19        | 31          | 281    |
|               |                  | %     | 100.0%                                             | 100.0%    | 100.0%      | 100.0% |

|                              | Value              | df | Asymp. Sig. (2-sided) |
|------------------------------|--------------------|----|-----------------------|
| Pearson Chi-Square           | 2.306 <sup>a</sup> | 2  | .316                  |
| Likelihood Ratio             | 2.562              | 2  | .278                  |
| Linear-by-Linear Association | .850               | 1  | .357                  |
| N of Valid Cases             | 281                |    |                       |

a. 2 cells (33.3%) have expected count less than 5. The minimum expected count is 2.70.

**Table 4: Feelings about Trump's Election by Gender**

|                         |                                 |       | Gender |        |            |             | Total  |
|-------------------------|---------------------------------|-------|--------|--------|------------|-------------|--------|
|                         |                                 |       | Male   | Female | Non-binary | No Response |        |
| Feelings about Election | Worried                         | Count | 32     | 107    | 6          | 111         | 256    |
|                         |                                 | %     | 97.0%  | 91.5%  | 100.0%     | 88.8%       | 91.1%  |
|                         | Not Worried, Neutral, or Unsure | Count | 1      | 10     | 0          | 14          | 25     |
|                         |                                 | %     | 3.0%   | 8.5%   | 0%         | 11.2%       | 8.9%   |
|                         | Total                           | Count | 33     | 117    | 6          | 125         | 281    |
|                         |                                 | %     | 100.0% | 100.0% | 100.0%     |             | 100.0% |

|                              | Value              | df | Asymp. Sig. (2-sided) |
|------------------------------|--------------------|----|-----------------------|
| Pearson Chi-Square           | 2.823 <sup>a</sup> | 3  | .420                  |
| Likelihood Ratio             | 3.738              | 3  | .291                  |
| Linear-by-Linear Association | 1.741              | 1  | .187                  |
| N of Valid Cases             | 281                |    |                       |

a. 2 cells (25.0%) have expected count less than 5. The minimum expected count is .53.

**Table 5: Feelings about Trump's Election and Social Movement Involvement**

|                                            |                                      | Levene's Test<br>for Equality of<br>Variances |      | t-test for Equality of Means |        |                        |                    |                          |                               |                                    |
|--------------------------------------------|--------------------------------------|-----------------------------------------------|------|------------------------------|--------|------------------------|--------------------|--------------------------|-------------------------------|------------------------------------|
|                                            |                                      | F                                             | Sig. | t                            | df     | Sig.<br>(2-<br>tailed) | Mean<br>Difference | Std. Error<br>Difference | 95%<br>Interval<br>Difference | Confidence<br>of the<br>Difference |
| Number of<br>Movements<br>Involved<br>with | Equal<br>variances<br>assumed        | 2.516                                         | .114 | 2.247                        | 279    | .025                   | .40953             | .18229                   | .05069                        | .76838                             |
|                                            | Equal<br>variances<br>not<br>assumed |                                               |      | 2.721                        | 31.990 | .010                   | .40953             | .15051                   | .10294                        | .71612                             |

**Table 6: Feelings about Trump's Election by Gender**

|                    |          |       | Agree or<br>Neutral | Disagree | Total  |
|--------------------|----------|-------|---------------------|----------|--------|
| Nonhumans<br>First | Disagree | Count | 16                  | 82       | 98     |
|                    |          | %     | 43.2%               | 37.8%    | 38.6%  |
|                    | Neutral  | Count | 8                   | 75       | 83     |
|                    |          | %     | 21.6%               | 34.6%    | 32.7%  |
|                    | Agree    | Count | 13                  | 60       | 73     |
|                    |          | %     | 35.1%               | 27.6%    | 28.7%  |
|                    | Total    | Count | 37                  | 217      | 254    |
|                    |          | %     | 100.0%              | 100.0%   | 100.0% |

|                              | Value              | df | Asymp. Sig. (2-sided) |
|------------------------------|--------------------|----|-----------------------|
| Pearson Chi-Square           | 2.480 <sup>a</sup> | 2  | .289                  |
| Likelihood Ratio             | 2.623              | 2  | .269                  |
| Linear-by-Linear Association | .020               | 1  | .889                  |
| N of Valid Cases             | 254                |    |                       |

a. 0 cells (0%) have expected count less than 5. The minimum expected count is 10.63.
