# Supplementary material
Source: MDPI journal article supplement (https://www.mdpi.com/2075-4698/7/4/32)
Supplement: s1 [file s1]

## Appendix

How long have you been vegan?

More than 5 years

1-5 years

Less than one year

What is your primary motivation for being a vegan?

Animal rights/ethics/welfare

My health

Environmental concerns

Which source brought you to veganism? If more than one response applies, please pick the source that had the strongest influence on you in motivating your transition to veganism.

An animal rights organization

A medical practitioner

A friend or family member

Social media

A documentary about veganism

A book or magazine article about veganism

My school or a teacher

I figured it out on my own

I can't remember

Other (fill in the blank)

Gender

Please fill in the blank as appropriate.

Race

Please fill in the blank as appropriate.

Sexual Orientation

Please fill in the blank as appropriate.

Do you identify as disabled?

No

Yes

Religion

Atheist / No religion

Agnostic

Christian

Jewish

Muslim

Other (fill in the blank)

Age

Under 18

18-25

24-34

35-44

45-54

55-64

65-74  
75+

In which state do you currently reside?

Area of residence

Urban  
Suburban  
Rural

What is your household's annual income?

Under 35,000  
35,000-55,000  
56,000-75,000  
76,000-100,000  
Over 100,000

I currently identify as...

Democrat  
Republican  
Green  
Libertarian  
None Undecided  
Other (fill in the blank)

In the 2016 American election, I voted for...

Hillary Clinton  
Donald Trump  
Jill Stein  
Gary Johnson  
Other (fill in the blank)  
I am eligible to vote, but chose not to do so I am not eligible to vote

I consider myself politically engaged

Yes  
No

I consider myself an activist

Yes  
No

With the election of Donald Trump, I feel...

Worried that social problems will increase  
Hopeful that social problems will decrease  
I'm not sure  
No opinion

Regarding the economy, security, and other social problems, Donald Trump promised to put "America first" in his campaigning and early days of presidency. Do you agree with this campaign promise?

I strongly agree with Trump's campaign promise  
I agree with Trump's campaign promise  
I am neutral or have no opinion about Trump's campaign promise  
I disagree with Trump's campaign promise  
I strongly disagree with Trump's campaign promise

Other than veganism, I am involved in the following movements  
Choose all that apply.

- None
- Black Lives Matter
- Prison abolition / Criminal justice reform
- Native American/Indigenous rights
- Environmentalism
- Feminism
- LGBT rights
- Fat acceptance / Body positivity
- Disability rights
- Homelessness advocacy
- Religious advocacy or missionary work
- Labor rights / Efforts to combat problems with capitalism
- Other (fill in the blank)

Generally speaking, how much contact would you say that you had with people of the following backgrounds last month?

Persons of color (Native Americans, persons of Asian, Latino, or African decent, etc.)

0 1 2 3 4 5 6 7 8 9 10

None at all A little A moderate amount A great deal

Persons from another country

0 1 2 3 4 5 6 7 8 9 10

None at all A little A moderate amount A great deal

Openly lesbian, gay, bisexual or trans persons

0 1 2 3 4 5 6 7 8 9 10

None at all A little A moderate amount A great deal

Persons from an economic background different than yourself

0 1 2 3 4 5 6 7 8 9 10

None at all A little A moderate amount A great deal

Persons with a disability

0 1 2 3 4 5 6 7 8 9 10

None at all A little A moderate amount A great deal

Persons of a religious background different than yourself

0 1 2 3 4 5 6 7 8 9 10

None at all A little A moderate amount A great deal

Persons with political affiliations/views other than your own

0 1 2 3 4 5 6 7 8 9 10

None at all A little A moderate amount A great deal

How comfortable would you be sharing a vegan social or political event (such as a potluck, organizational meeting, or protest) with the following?

Persons of color (Native Americans, persons of Asian, Latino, or African decent, etc.)

0 1 2 3 4 5 6 7 8 9 10

Extremely uncomfortable Extremely comfortable

Persons from another country

0 1 2 3 4 5 6 7 8 9 10  
Extremely uncomfortable Extremely comfortable

Openly lesbian, gay, bisexual or trans persons

0 1 2 3 4 5 6 7 8 9 10  
Extremely uncomfortable Extremely comfortable

Persons from an economic background different than yourself

0 1 2 3 4 5 6 7 8 9 10  
Extremely uncomfortable Extremely comfortable

Persons with a disability

0 1 2 3 4 5 6 7 8 9 10  
Extremely uncomfortable Extremely comfortable

Persons of a religious background different than yourself

0 1 2 3 4 5 6 7 8 9 10  
Extremely uncomfortable Extremely comfortable

Persons with political affiliations/views other than your own

0 1 2 3 4 5 6 7 8 9 10  
Extremely uncomfortable Extremely comfortable

How well do you believe the vegan movement addresses issues related to the following? If you are unsure or have no opinion, select the neutral response ("Neither badly nor well").

Age or ageism

0 1 2 3 4 5 6 7 8 9 10  
Very badly Very well

Disability or ableism

0 1 2 3 4 5 6 7 8 9 10  
Very badly Very well

Race or racism

0 1 2 3 4 5 6 7 8 9 10  
Very badly Very well

Differences in religious beliefs and religion-related harassment

0 1 2 3 4 5 6 7 8 9 10  
Very badly Very well

Differences in political affiliation or harassment based on political affiliation

0 1 2 3 4 5 6 7 8 9 10  
Very badly Very well

Sex/gender or sexism

0 1 2 3 4 5 6 7 8 9 10  
Very badly Very well

Sexual orientation or heterosexism/homophobia

0 1 2 3 4 5 6 7 8 9 10  
Very badly Very well

Socioeconomic class or classism (discrimination against poor persons)

|            |   |   |   |   |   |   |   |   |           |    |
|------------|---|---|---|---|---|---|---|---|-----------|----|
| 0          | 1 | 2 | 3 | 4 | 5 | 6 | 7 | 8 | 9         | 10 |
| Very badly |   |   |   |   |   |   |   |   | Very well |    |

In your opinion, how relevant are the following movements to veganism?

Black Lives Matter

|                     |   |   |   |   |   |   |   |   |               |    |
|---------------------|---|---|---|---|---|---|---|---|---------------|----|
| 0                   | 1 | 2 | 3 | 4 | 5 | 6 | 7 | 8 | 9             | 10 |
| Not at all relevant |   |   |   |   |   |   |   |   | Very relevant |    |

Prison abolition / Criminal justice reform

|                     |   |   |   |   |   |   |   |   |               |    |
|---------------------|---|---|---|---|---|---|---|---|---------------|----|
| 0                   | 1 | 2 | 3 | 4 | 5 | 6 | 7 | 8 | 9             | 10 |
| Not at all relevant |   |   |   |   |   |   |   |   | Very relevant |    |

Native American/Indigenous rights

|                     |   |   |   |   |   |   |   |   |               |    |
|---------------------|---|---|---|---|---|---|---|---|---------------|----|
| 0                   | 1 | 2 | 3 | 4 | 5 | 6 | 7 | 8 | 9             | 10 |
| Not at all relevant |   |   |   |   |   |   |   |   | Very relevant |    |

Environmentalism

|                     |   |   |   |   |   |   |   |   |               |    |
|---------------------|---|---|---|---|---|---|---|---|---------------|----|
| 0                   | 1 | 2 | 3 | 4 | 5 | 6 | 7 | 8 | 9             | 10 |
| Not at all relevant |   |   |   |   |   |   |   |   | Very relevant |    |

Feminism LGBT rights

|                     |   |   |   |   |   |   |   |   |               |    |
|---------------------|---|---|---|---|---|---|---|---|---------------|----|
| 0                   | 1 | 2 | 3 | 4 | 5 | 6 | 7 | 8 | 9             | 10 |
| Not at all relevant |   |   |   |   |   |   |   |   | Very relevant |    |

Fat acceptance / Body positivity

|                     |   |   |   |   |   |   |   |   |               |    |
|---------------------|---|---|---|---|---|---|---|---|---------------|----|
| 0                   | 1 | 2 | 3 | 4 | 5 | 6 | 7 | 8 | 9             | 10 |
| Not at all relevant |   |   |   |   |   |   |   |   | Very relevant |    |

Disability rights

|                     |   |   |   |   |   |   |   |   |               |    |
|---------------------|---|---|---|---|---|---|---|---|---------------|----|
| 0                   | 1 | 2 | 3 | 4 | 5 | 6 | 7 | 8 | 9             | 10 |
| Not at all relevant |   |   |   |   |   |   |   |   | Very relevant |    |

Religious advocacy or missionary work

|                     |   |   |   |   |   |   |   |   |               |    |
|---------------------|---|---|---|---|---|---|---|---|---------------|----|
| 0                   | 1 | 2 | 3 | 4 | 5 | 6 | 7 | 8 | 9             | 10 |
| Not at all relevant |   |   |   |   |   |   |   |   | Very relevant |    |

Homelessness advocacy

|                     |   |   |   |   |   |   |   |   |               |    |
|---------------------|---|---|---|---|---|---|---|---|---------------|----|
| 0                   | 1 | 2 | 3 | 4 | 5 | 6 | 7 | 8 | 9             | 10 |
| Not at all relevant |   |   |   |   |   |   |   |   | Very relevant |    |

Labor rights / Efforts to combat problems with capitalism

|                     |   |   |   |   |   |   |   |   |               |    |
|---------------------|---|---|---|---|---|---|---|---|---------------|----|
| 0                   | 1 | 2 | 3 | 4 | 5 | 6 | 7 | 8 | 9             | 10 |
| Not at all relevant |   |   |   |   |   |   |   |   | Very relevant |    |

Please indicate your level of agreement with the following statements about diversity in the vegan movement.

The vegan movement has visible leadership in fostering diversity in the movement

|                   |   |   |   |   |                |   |   |   |   |    |
|-------------------|---|---|---|---|----------------|---|---|---|---|----|
| 0                 | 1 | 2 | 3 | 4 | 5              | 6 | 7 | 8 | 9 | 10 |
| Strongly disagree |   |   |   |   | Strongly agree |   |   |   |   |    |

I feel awkward in the vegan movement when I am around people from backgrounds different than my own

0 1 2 3 4 5 6 7 8 9 10  
Strongly disagree Strongly agree

The vegan movement has a climate that feels welcoming to me  
0 1 2 3 4 5 6 7 8 9 10  
Strongly disagree Strongly agree

I feel comfortable discussing diversity issues in the vegan movement  
0 1 2 3 4 5 6 7 8 9 10  
Strongly disagree Strongly agree

I feel informed about topics of inequality that are not related to nonhuman animals  
0 1 2 3 4 5 6 7 8 9 10  
Strongly disagree Strongly agree

I believe the vegan movement should be involved with other social movements  
0 1 2 3 4 5 6 7 8 9 10  
Strongly disagree Strongly agree

I believe the vegan movement should put nonhumans first  
0 1 2 3 4 5 6 7 8 9 10  
Strongly disagree Strongly agree
